# Supplementary material for: Probing the mesoscopic size limit of quantum anomalous Hall insulators
Source: PubMed Central journal article supplement (PMC9307791; doi:10.1038/s41467-022-31105-w), 2022-07-22
Supplement: 41467_2022_31105_MOESM1_ESM.pdf [file 41467_2022_31105_MOESM1_ESM.pdf]

## Supplementary Information

### Probing the mesoscopic size limit of quantum anomalous Hall insulators

Peng Deng<sup>1\*</sup>, Christopher Eckberg<sup>2,3,4\*</sup>, Peng Zhang<sup>1</sup>, Gang Qiu<sup>1</sup>, Eve Emmanouilidou<sup>5</sup>, Gen Yin<sup>1</sup>,  
Su Kong Chong<sup>1</sup>, Lixuan Tai<sup>1</sup>, Ni Ni<sup>5</sup>, and Kang L. Wang<sup>1,5\*</sup>

<sup>1</sup>*Department of Electrical and Computer Engineering, University of California Los Angeles,*

*Los Angeles, California 90095, USA*

<sup>2</sup>*Fibertek Inc., Herndon, VA 20171*

<sup>3</sup>*US Army Research Laboratory, Adelphi, MD 20783*

<sup>4</sup>*US Army Research Laboratory, Playa Vista, CA 90094*

<sup>5</sup>*Department of Physics and Astronomy, University of California Los Angeles,*

*Los Angeles, California 90095, USA*

\*Corresponding authors: dengpeng@g.ucla.edu (P. D.), chris.eckberg@fibertek.com (C. E.),  
wang@ee.ucla.edu (K. L. W.)

#### 1. Transport behavior in the $T \rightarrow 0$ limit.

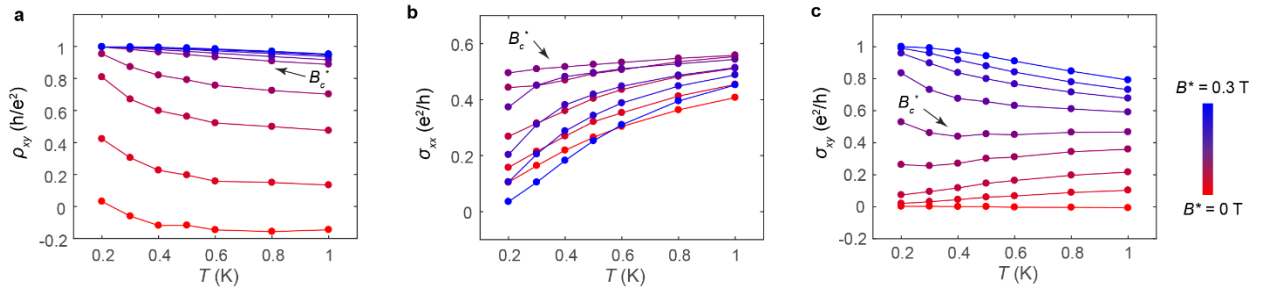

**Supplementary Figure 1.** The limiting transport behavior of  $\rho_{yx}$ ,  $\sigma_{xy}$ , and  $\sigma_{xx}$  in the  $T \rightarrow 0$  limit under different  $B^*$ . The red, purple (denoted by  $B_c^*$ ), and blue data represent the QAH, quantum

critical, and insulating regimes, respectively.

## 2. Current dependence of $\rho_{yx}$ in the QAH regime.

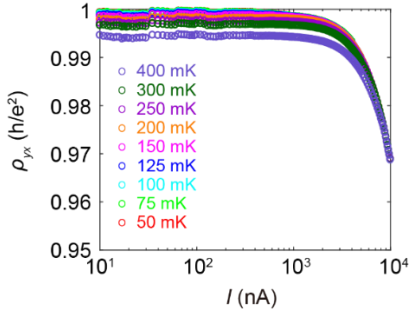

**Supplementary Figure 2.** Current dependence of  $\rho_{yx}$  under different temperatures in the QAH regime. All data are measured under a 1 T magnetic field.

## 3. Temperature dependence of $\rho_{xx}$ in the QAH regime.

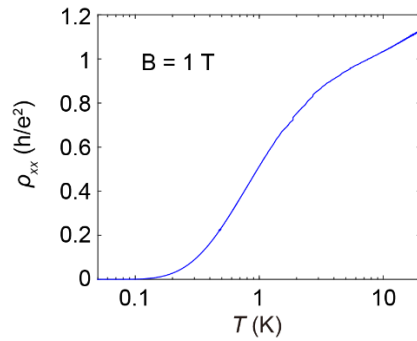

**Supplementary Figure 3.** Temperature dependence of  $\rho_{xx}$  under 1 T magnetic field. The curve was measured using a 10 nA excitation current.

## 4. Field dependence of $\rho_{xx}$ .

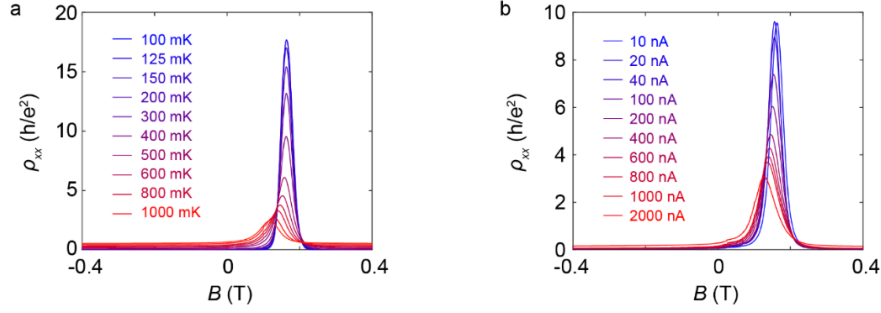

**Supplementary Figure 4. a**, Field dependence of  $\rho_{xx}$  under different temperatures. The field sweeping direction is from negative to positive. All curves are measured under a 10 nA current. **b**, Field dependence of  $\rho_{xx}$  under different currents. All curves are measured at 200 mK.

### 5. Inelastic scattering exponent $p$ in another sample

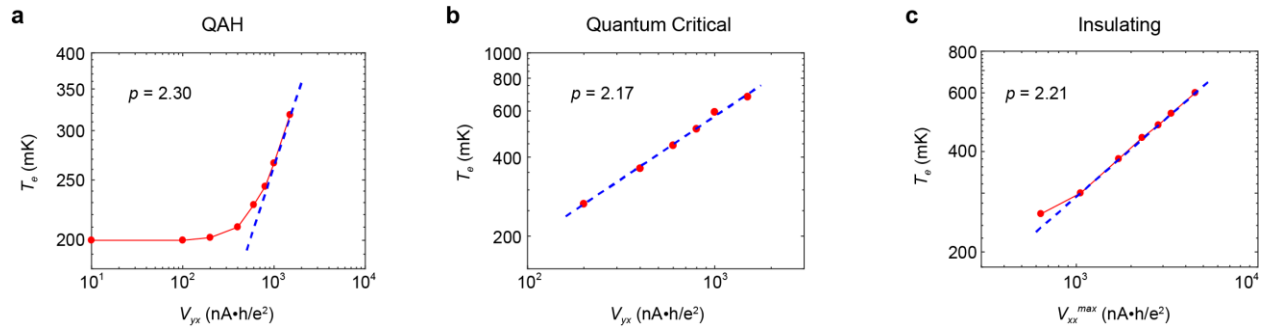

**Supplementary Figure 5.** Inelastic scattering exponent  $p$  obtained in the **a**, QAH, **b**, quantum critical, and **c**, insulating regimes. Although the values are slightly larger than that examined in the main text, the values are comparable for different regimes in this sample.

### 6. Current dependence of $(\partial\sigma_{xy}/\partial B)_{max}$ in the quantum critical regime for the 5- $\mu$ m-sample

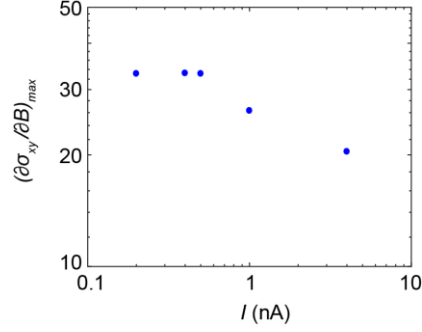

**Supplementary Figure 6.** Current dependence of  $(\partial\sigma_{xy}/\partial B)_{max}$ . All data are measured at 100 mK.

The current heating effect is neglectable when  $I$  is no larger than 0.5 nA.

### 7. Finite-size effect in another 5- $\mu\text{m}$ -sample.

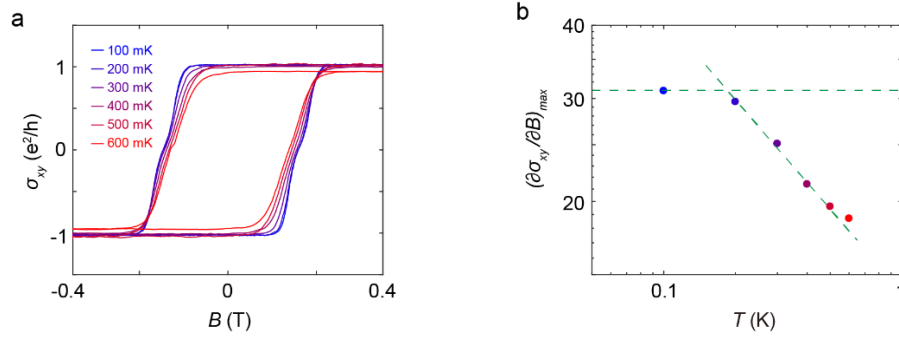

**Supplementary Figure 7. a**, Field dependence of  $\sigma_{xy}$  at different temperatures. **b**, Temperature dependence of  $(\partial\sigma_{xy}/\partial B)_{max}$ . For this sample, the saturation temperature is also around 190 mK.
